# Supplementary material
Source: PubMed Central journal article supplement (PMC3796030)
Supplement: NIHMS482440-supplement-Supp_Material.pdf [file NIHMS482440-supplement-Supp_Material.pdf]

100 $\mu$ M DDC, 24h

Endoplasmic  
reticulum

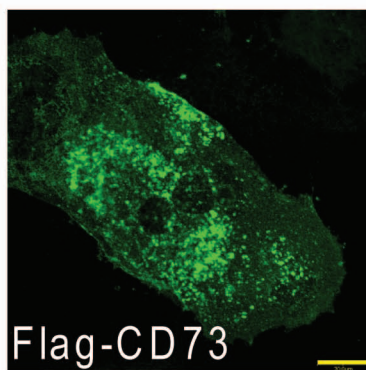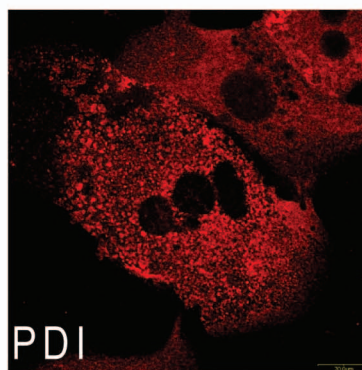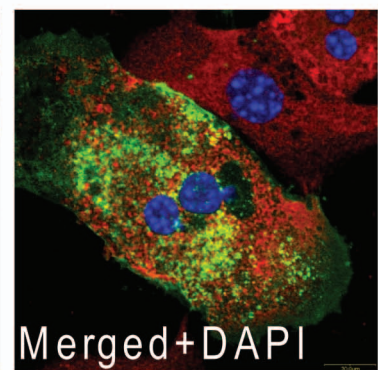

Early  
endosomes

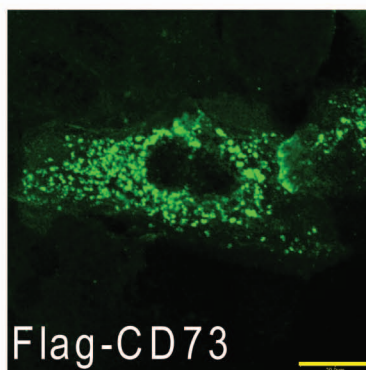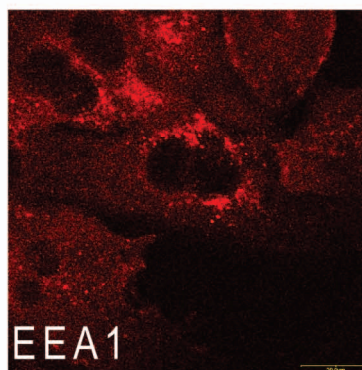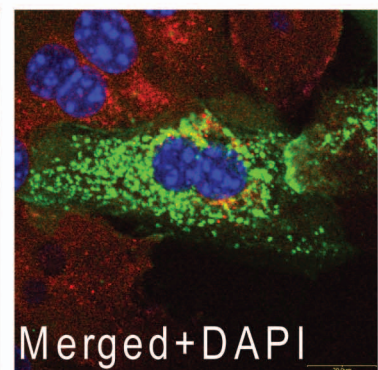

Golgi

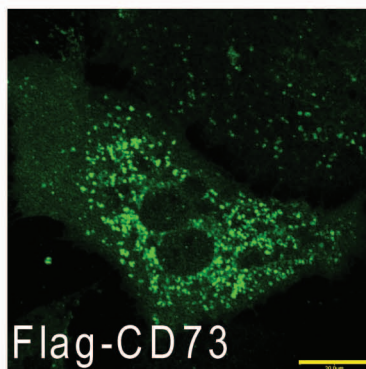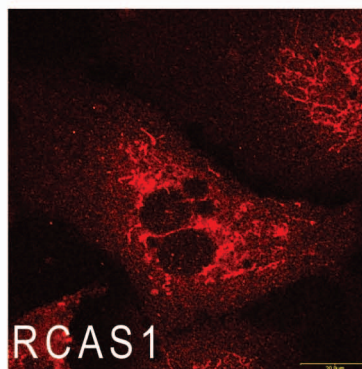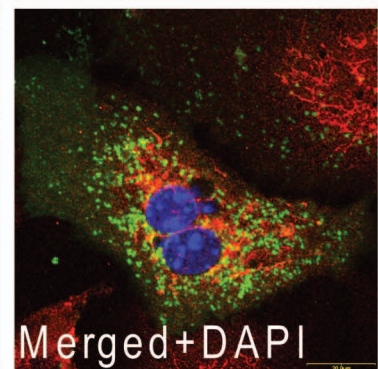

Lysozomes

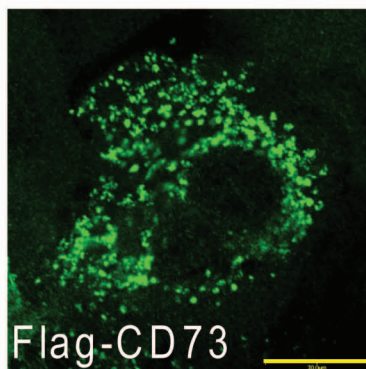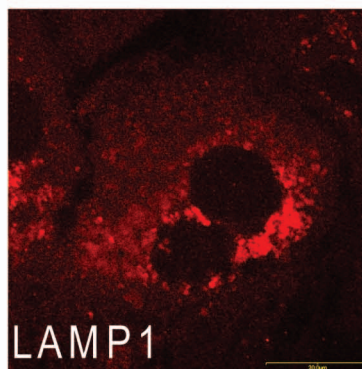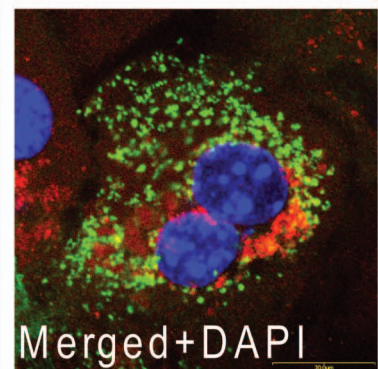

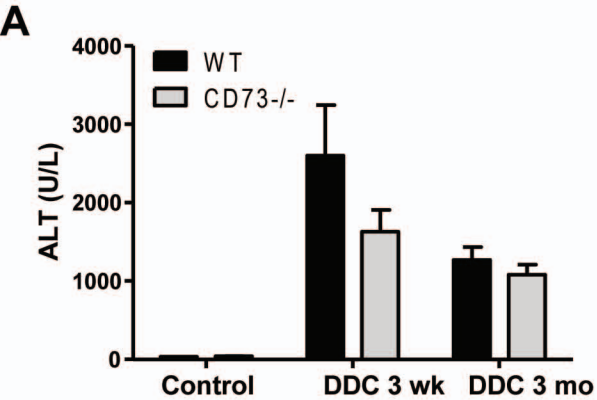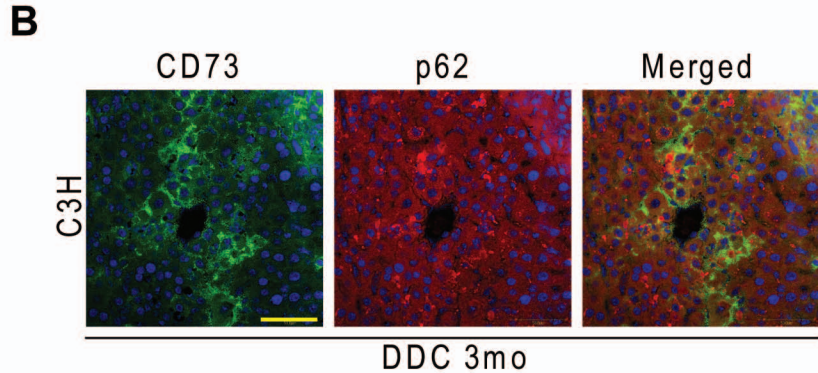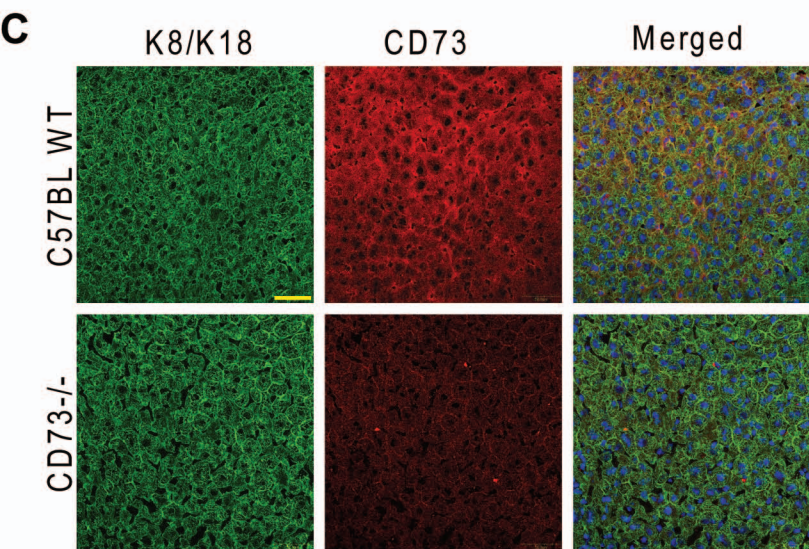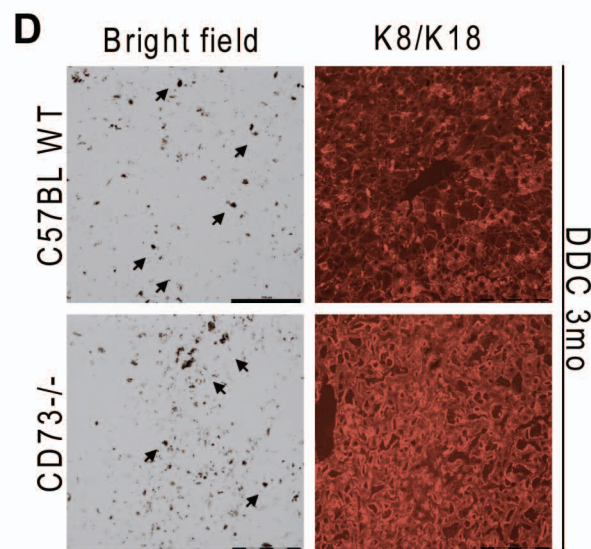

Supplementary Figure 2

| <b>Supplementary Table 1. Primers used for qPCR of human (h) and mouse (m) genes</b> |                          |
|--------------------------------------------------------------------------------------|--------------------------|
| h18S-F                                                                               | CCATCCAATCGGTAGTAGCG     |
| h18S-R                                                                               | GTAACCCGTTGAACCCATT      |
| hCD73-F                                                                              | CTCCTCTCAATCATGCCGCT     |
| hCD73-R                                                                              | CAAATGTGCCTCCAAAGGGC     |
| hCOL1A1-F                                                                            | GAACATCACCTACCACTGCA     |
| hCOL1A1-R                                                                            | GTTGGGATGGAGGGAGTTTA     |
| hCXCL10-F                                                                            | TTTGCTGCCTTATCTTTCTGACTC |
| hCXCL10-R                                                                            | GATGGCCTTCGATTCTGGATTC   |
| hFABP4-F                                                                             | CTTAGATGGGGGTGTCCTGGTA   |
| hFABP4-R                                                                             | AACGTCCCTTGGCTTATGCTC    |
| hIFNG-F                                                                              | GTTTTGGGTTCTCTTGGCTGTTA  |
| hIFNG-R                                                                              | TTTGGCTCTGCATTATTTTTCTGT |
| m18S-F                                                                               | ACCTGGTTGATCCTGCCAGTAG   |
| m18S-R                                                                               | TTAATGAGCCATTCGCAGTTTC   |
| mADA-F                                                                               | CCCTCCCGGCAGATACAGTGG    |
| mADA-R                                                                               | ACGCCCTCCTTGCCTTCATCT    |
| mAPRT-F                                                                              | GGCCTCCCATCTGAAGTCCAC    |
| mAPRT-R                                                                              | GGCCAGCAGGTCATCCACAAT    |
| mCD39-F                                                                              | CATCCAAGCATCACCAGACT     |
| mCD39-R                                                                              | ATGATCTTGGCACCCCTGGAA    |
| mCD73-F                                                                              | CAAGTTCTCTGCAGCAAGTCATTA |
| mCD73-R                                                                              | TGTTACAAAGCCAGGTCTCCAG   |
| mPNP-F                                                                               | CGCCCCCTGCTAAAGCCCTATGG  |
| mPNP-R                                                                               | GGAGGGGTCTAATCACGGTCACAG |
| mXO-F                                                                                | CCTGGCGGACGCGATTGCTAC    |
| mXO-R                                                                                | ATGGGGCTCGCGGTGATGATG    |

## Supplementary Table 2. Characteristics of human specimens used for qPCR

**A**

| Sample    | Ishak Score | Steatohepatitis Grading |                        |            |                  | Periportal Inflammation | MDBs | Evidence of steatohepatitis |
|-----------|-------------|-------------------------|------------------------|------------|------------------|-------------------------|------|-----------------------------|
|           |             | Steatosis               | Lobular Inflammation   | Ballooning | Total NASH score |                         |      |                             |
| Control 1 | 0           | 0                       | 0                      | 0          | 0                | 0                       | 0    | No                          |
| Control 2 | 0           | 0                       | 0                      | 0          | 0                | 0                       | 0    | No                          |
| HCV 1     | 1           | 1                       | 1 (mostly lymphocytes) | 0          | 2                | 2 (mostly lymphocytes)  | 0    | No                          |
| HCV 2     | 2           | 0                       | 1 (mostly lymphocytes) | 0          | 1                | 1 (mostly lymphocytes)  | 0    | No                          |
| HCV 3     | 5           | 0                       | 1 (mostly lymphocytes) | 0          | 1                | 1 (mostly lymphocytes)  | 0    | No                          |
| HCV 4     | 6           | 1                       | 1 (mostly lymphocytes) | 0          | 2                | 2 (mostly lymphocytes)  | 1    | No                          |

| Scoring systems: |        |                      |                         |                     |      |                         |          |
|------------------|--------|----------------------|-------------------------|---------------------|------|-------------------------|----------|
| Steatosis:       |        | Lobular inflammation |                         | Ballooning and MDBs |      | Periportal inflammation |          |
| 0                | <5%    | 0                    | No foci                 | 0                   | None | 0                       | None     |
| 1                | 5-33%  | 1                    | <2 foci per 200X field  | 1                   | Few  | 1                       | Mild     |
| 2                | 33-66% | 2                    | 2-4 foci per 200X field | 2                   | Many | 2                       | Moderate |
| 3                | >66%   | 3                    | >4 foci per 200X field  |                     |      | 3                       | Severe   |

**B**

| Sample  | Fibrosis Grade | Steatosis Grade | Liver Biopsy Reading                                                                               |
|---------|----------------|-----------------|----------------------------------------------------------------------------------------------------|
| NAFLD 1 | 3              | 2               | Steatosis with bridging and pericellular fibrosis                                                  |
| NAFLD 2 | 3              | 1               | Mild steatosis with rare ballooning hepatocytes. Bridging fibrosis and focal pericellular fibrosis |
| NAFLD 3 | 1              | 0               | Nondiagnostic changes: spotty remote lobular necrosis, mild portal lymphocytosis.                  |
| NAFLD 4 | 1              | 1               | Mild steatosis. Trichrome stain shows no fibrosis                                                  |

| <b>Supplementary Table 3. Statistically-significant metabolite differences between C3H and C57BL mouse livers</b> |                        |                |                         |                                       |
|-------------------------------------------------------------------------------------------------------------------|------------------------|----------------|-------------------------|---------------------------------------|
|                                                                                                                   | <b>C3H:C57BL ratio</b> | <b>p value</b> | <b>HMDB Accession #</b> | <b>Function</b>                       |
| <b>Amino Acids</b>                                                                                                |                        |                |                         |                                       |
| 5-aminopentanoate                                                                                                 | 2.2                    | 0.02           | HMDB03355               | protein and amino acid biosynthesis   |
| N-alpha-acetyllysine                                                                                              | 1.2                    | 0.03           | HMDB00446               | protein and amino acid biosynthesis   |
| asparagine                                                                                                        | 0.76                   | 0.01           | HMDB33780               | nutrient                              |
| N-acetylglutamic acid                                                                                             | 0.57                   | 0.02           | HMDB01138               | urea cycle                            |
| O-succinyl-L-homoserine                                                                                           | 0.36                   | 0.02           | N/A                     | amino acid metabolism                 |
| <b>Carbohydrates</b>                                                                                              |                        |                |                         |                                       |
| N-acetyl-D-glucosamine                                                                                            | 1.9                    | 0.02           | HMDB00215               | glycoprotein metabolism               |
| 6-deoxy-L-galactose                                                                                               | 1.3                    | 0.03           | HMDB00174               | component of N-linked glycans         |
| <b>Vitamins</b>                                                                                                   |                        |                |                         |                                       |
| tocopherol                                                                                                        | 1.5                    | 0.01           | HMDB01893               | antioxidant                           |
| retinoate                                                                                                         | 0.36                   | 0.02           | HMDB12874               | cell signaling, energy source/storage |
| <b>Lipids</b>                                                                                                     |                        |                |                         |                                       |
| behenic acid                                                                                                      | 0.69                   | 0.03           | HMDB00944               | cell signaling, energy source/storage |
